# Supplementary material for: Genomic evidence of bitter taste in snakes and phylogenetic analysis of bitter taste receptor genes in reptiles
Source: PubMed Central journal article supplement (PMC5564386; doi:10.7717/peerj.3708), 2017-08-18

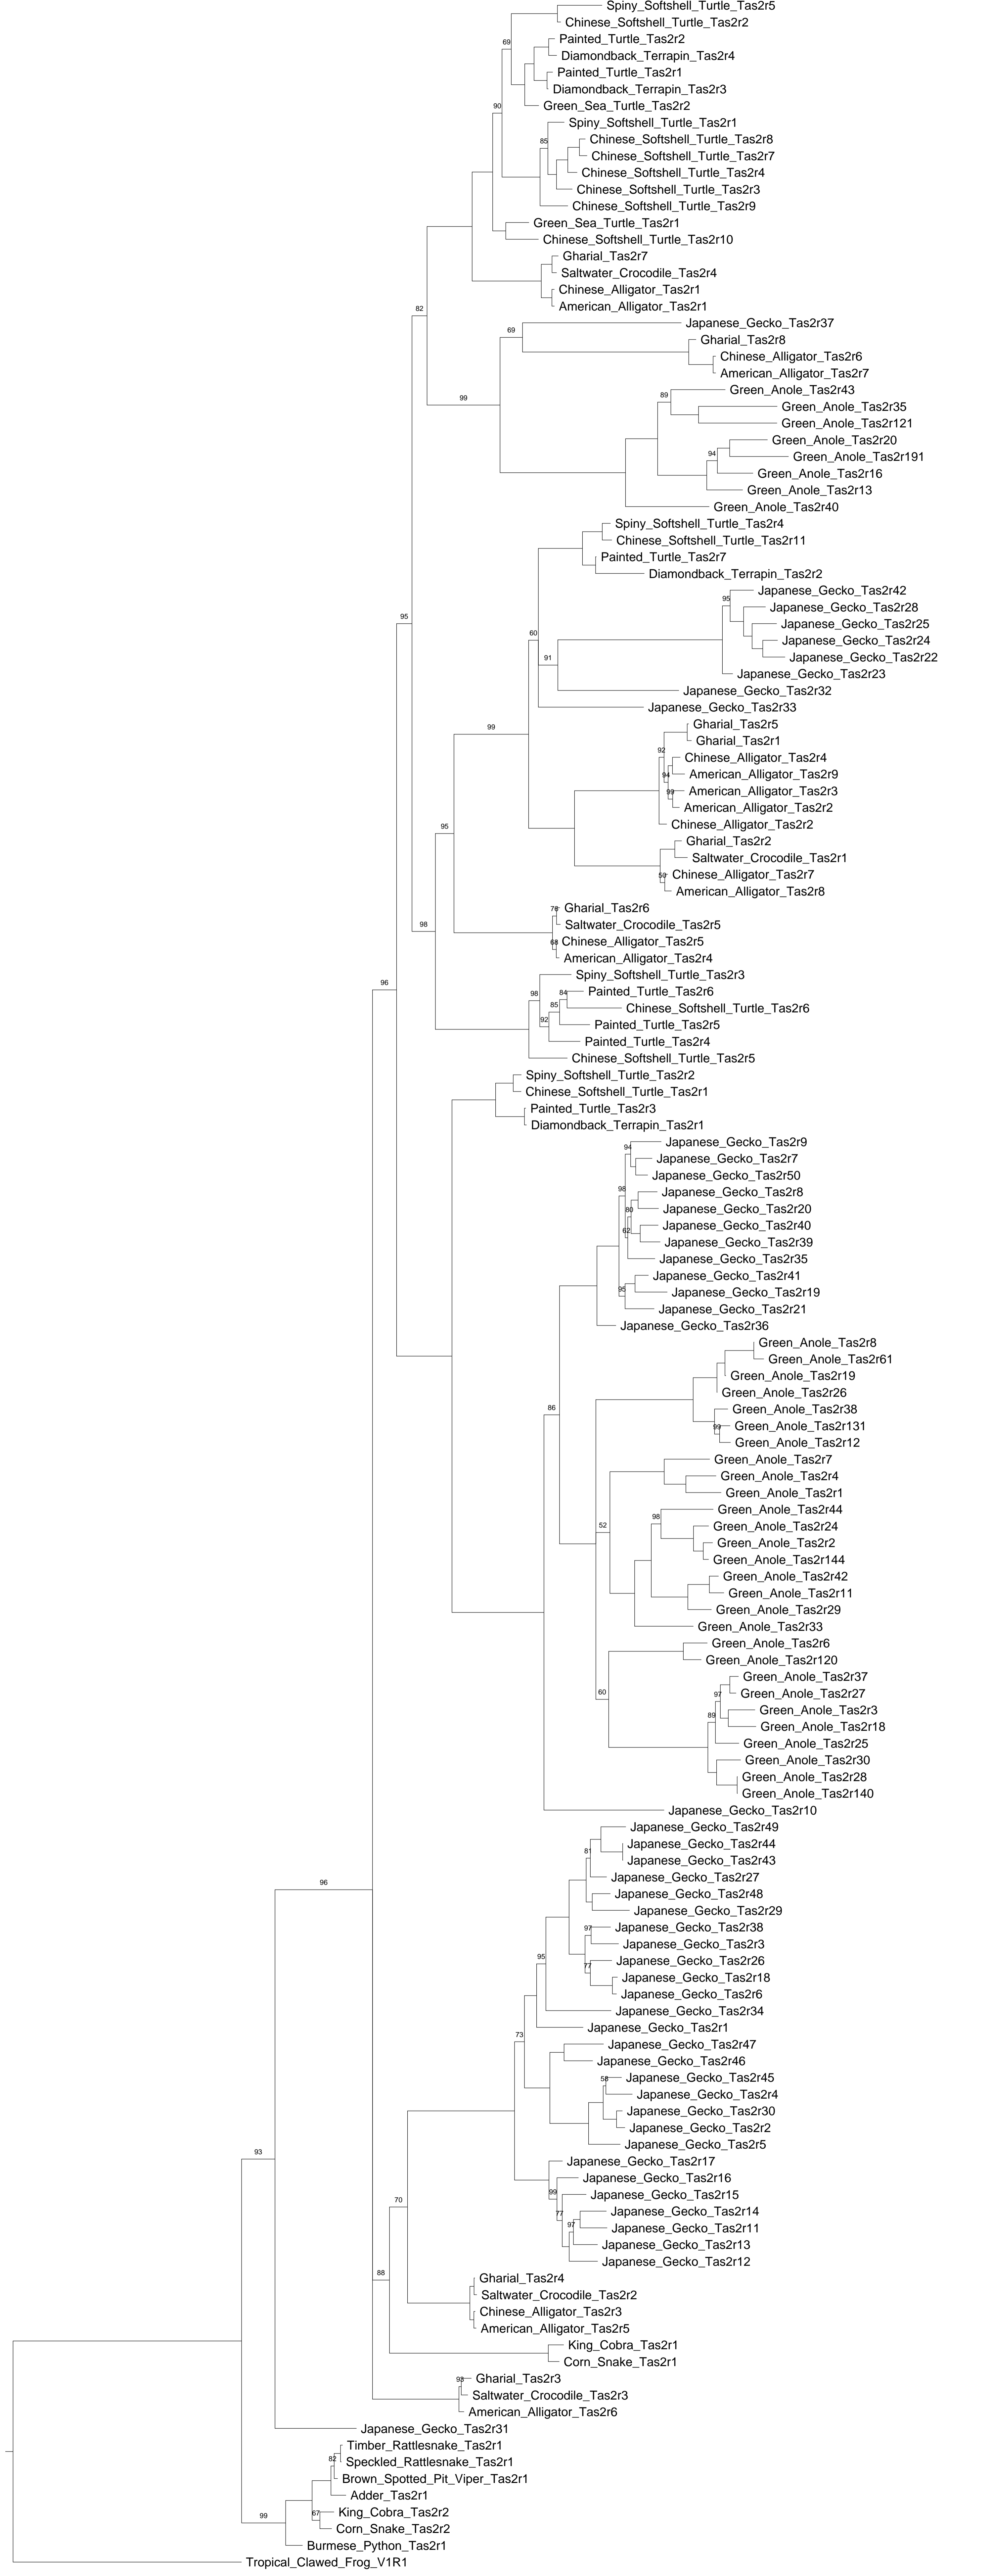

Supplement: peerj-05-3708-s005.pdf [file peerj-05-3708-s005.pdf]
